# Supplementary material for: The Automatic Solution of Macromolecular Crystal Structures via Molecular Replacement Techniques: REMO22 and Its Pipeline
Source: MDPI journal article supplement (doi:10.3390/ijms24076070), 2023-03-23
Supplement: s1 [file s1]

---

**SUPPLEMENTARY MATERIALS**

## Article

# The Automatic Solution of Macromolecular Crystal Structures via Molecular Replacement Techniques: REMO22 and Its Pipeline

**Table S1.** The PDB codes of the target structures (Tar.) and of the corresponding MR models (Mod.) used in our experimental tests. Dashes indicate models designed by the original authors, which are available on request.

[illegible]

**Table S2.** The crystallographic residuals R and average phase error  $\langle |\Delta\phi| \rangle$  obtained by running the three MR test programs in default conditions.  $\langle |\Delta\phi| \rangle_R$  and  $R_R$  refer to REMO22,  $\langle |\Delta\phi| \rangle_P$  and  $R_P$  to PHASER,  $\langle |\Delta\phi| \rangle_M$  and  $R_M$  to MOLREP. The data for the first structure of each subset (PH, PD, PG, DNA, RNA in the order) are in bold. Dashes correspond to cases in which PHASER stops prematurely while trying to estimate the number of chains in the target asymmetric unit.

| PDB         | $\langle  \Delta\phi  \rangle_R$ | $R_R$     | $\langle  \Delta\phi  \rangle_P$ | $R_P$     | $\langle  \Delta\phi  \rangle_M$ | $R_M$     | PDB         | $\langle  \Delta\phi  \rangle_R$ | $R_R$     | $\langle  \Delta\phi  \rangle_P$ | $R_P$     | $\langle  \Delta\phi  \rangle_M$ | $R_M$     |
|-------------|----------------------------------|-----------|----------------------------------|-----------|----------------------------------|-----------|-------------|----------------------------------|-----------|----------------------------------|-----------|----------------------------------|-----------|
| <b>1a6m</b> | <b>26</b>                        | <b>29</b> | <b>27</b>                        | <b>30</b> | <b>26</b>                        | <b>30</b> | 1aki        | 22                               | 22        | 22                               | 23        | 22                               | 23        |
| 1bxo        | 25                               | 31        | 34                               | 35        | 31                               | 35        | 1dy5        | 15                               | 22        | 16                               | 22        | 90                               | 43        |
| 1kf4        | 12                               | 19        | 13                               | 19        | 11                               | 20        | 1kqw        | 33                               | 31        | 35                               | 33        | 40                               | 34        |
| 1lat        | 58                               | 45        | 73                               | 54        | 66                               | 49        | 1lys        | 29                               | 22        | 29                               | 23        | 59                               | 42        |
| 1na7        | 32                               | 24        | 35                               | 27        | 35                               | 27        | 1s31        | 34                               | 28        | 38                               | 31        | 38                               | 31        |
| 1tgx        | 48                               | 43        | 73                               | 52        | 40                               | 37        | 1tp3        | 24                               | 28        | 25                               | 28        | 25                               | 28        |
| 1xyg        | 43                               | 32        | 49                               | 36        | 53                               | 39        | 1ycn        | 32                               | 25        | 62                               | 46        | 35                               | 28        |
| 1yxa        | 44                               | 35        | 79                               | 52        | 74                               | 50        | 1zs0        | 31                               | 29        | 31                               | 30        | 31                               | 30        |
| 2a03        | 33                               | 30        | 37                               | 34        | 37                               | 32        | 2a46        | 40                               | 37        | 50                               | 42        | 49                               | 42        |
| 2a4k        | 39                               | 31        | 67                               | 46        | 45                               | 35        | 2ah8        | 33                               | 28        | 58                               | 45        | 33                               | 29        |
| 2ayv        | 34                               | 27        | 41                               | 32        | 37                               | 29        | 2b5o        | 39                               | 28        | 62                               | 46        | 46                               | 37        |
| 2f53        | 30                               | 24        | 34                               | 26        | 34                               | 26        | 2f84        | 37                               | 31        | 40                               | 32        | 40                               | 32        |
| 2fc3        | 40                               | 34        | 44                               | 37        | 44                               | 37        | 2gq3        | 33                               | 25        | 54                               | 40        | 33                               | 26        |
| 2h8q        | 35                               | 28        | 59                               | 47        | 36                               | 30        | 2hyw        | 89                               | 50        | 31                               | 25        | 31                               | 25        |
| 2i3p        | 31                               | 26        | 31                               | 27        | 30                               | 24        | 2iff        | 75                               | 39        | 67                               | 45        | 68                               | 45        |
| 2o3k        | 26                               | 23        | 27                               | 25        | 28                               | 25        | 2oka        | 28                               | 23        | 27                               | 24        | 27                               | 24        |
| 2omt        | 31                               | 25        | 32                               | 25        | 32                               | 26        | 2otb        | 37                               | 31        | 38                               | 32        | 42                               | 33        |
| 2p0g        | 37                               | 32        | 90                               | 55        | 59                               | 42        | 2pby        | 45                               | 35        | 82                               | 51        | 77                               | 49        |
| 2qu5        | 27                               | 22        | 26                               | 23        | 26                               | 24        | 2sar        | 43                               | 39        | 67                               | 50        | 49                               | 41        |
| 6ebx        | 24                               | 23        | 55                               | 45        | 27                               | 28        | 6rhn        | 27                               | 25        | 28                               | 26        | 28                               | 27        |
| <b>3nng</b> | <b>71</b>                        | <b>43</b> | <b>77</b>                        | <b>52</b> | <b>89</b>                        | <b>53</b> | 3npg        | 80                               | 45        | 84                               | 50        | 89                               | 50        |
| 3nr6        | 88                               | 54        | 89                               | 56        | 87                               | 57        | 3o8s        | 59                               | 45        | 90                               | 54        | 89                               | 53        |
| 3on5        | 51                               | 39        | 69                               | 47        | 70                               | 48        | 3q6o        | 73                               | 45        | 80                               | 51        | 83                               | 55        |
| 3tx8        | 69                               | 42        | 78                               | 51        | 85                               | 52        | 3zyt        | 80                               | 49        | 86                               | 55        | 85                               | 55        |
| 4e2t        | 29                               | 28        | 58                               | 43        | 53                               | 38        | 4fqd        | 78                               | 43        | 79                               | 49        | 81                               | 50        |
| 1cgn        | 55                               | 40        | 74                               | 49        | 80                               | 52        | 1cgo        | 71                               | 47        | 79                               | 51        | 76                               | 50        |
| 1e8a        | 39                               | 33        | 73                               | 48        | 54                               | 40        | 2f8m        | 42                               | 36        | 68                               | 51        | 51                               | 41        |
| 5ww0        | 56                               | 42        | 72                               | 50        | 75                               | 51        | <b>1vkf</b> | <b>90</b>                        | <b>53</b> | <b>84</b>                        | <b>53</b> | <b>80</b>                        | <b>51</b> |
| 1vki        | 39                               | 36        | 82                               | 53        | 82                               | 52        | 1vl2        | 36                               | 33        | 66                               | 49        | 63                               | 45        |
| 1vl7        | 39                               | 33        | 72                               | 49        | 47                               | 38        | 1vlc        | 32                               | 31        | 44                               | 36        | 52                               | 40        |
| 2wu6        | 34                               | 30        | 40                               | 32        | 44                               | 35        | 2x7h        | 39                               | 24        | 54                               | 40        | 34                               | 24        |
| 3e49        | 44                               | 36        | 71                               | 49        | 38                               | 30        | 3gp0        | 44                               | 35        | 60                               | 44        | 68                               | 47        |
| 3h9e        | 28                               | 25        | 56                               | 45        | 28                               | 26        | 3h9r        | 50                               | 36        | 54                               | 39        | 56                               | 40        |
| 3khu        | 31                               | 26        | 53                               | 38        | 57                               | 40        | 3l23        | 41                               | 34        | 51                               | 38        | 56                               | 39        |
| 3llx        | 37                               | 36        | 43                               | 38        | 45                               | 38        | 3m7a        | 41                               | 35        | 73                               | 49        | 53                               | 40        |
| 3mbj        | 47                               | 36        | 67                               | 44        | 67                               | 44        | 3mcq        | 47                               | 40        | 73                               | 50        | 74                               | 52        |
| 3mdo        | 31                               | 28        | 60                               | 45        | 32                               | 29        | 3mz2        | 89                               | 48        | 89                               | 51        | 89                               | 51        |
| 3nyy        | 65                               | 48        | 74                               | 51        | 80                               | 51        | 3obi        | 89                               | 49        | 78                               | 50        | 71                               | 47        |
| 3oz2        | 43                               | 41        | 74                               | 52        | 81                               | 52        | 3p94        | 48                               | 37        | 72                               | 49        | 45                               | 34        |
| 3ufi        | 53                               | 42        | 79                               | 51        | 75                               | 51        | 3us5        | 38                               | 39        | 47                               | 43        | 49                               | 43        |
| 4e2e        | 32                               | 28        | 36                               | 30        | 35                               | 31        | 4ef2        | 36                               | 30        | 65                               | 48        | 53                               | 39        |

---

|             |           |           |           |           |           |           |             |           |           |           |           |           |           |
|-------------|-----------|-----------|-----------|-----------|-----------|-----------|-------------|-----------|-----------|-----------|-----------|-----------|-----------|
| 4ezg        | 25        | 26        | 26        | 27        | 57        | 40        | 4fvs        | 89        | 53        | 80        | 54        | 89        | 52        |
| 4gbs        | 37        | 32        | 64        | 49        | 41        | 36        | 4gcm        | 33        | 30        | 68        | 49        | 38        | 33        |
| 4ler        | 30        | 31        | 35        | 32        | 37        | 32        | 4mru        | 49        | 34        | 72        | 47        | 53        | 36        |
| 4ogz        | 46        | 36        | 73        | 47        | 58        | 41        | 4ouq        | 25        | 28        | 28        | 29        | 29        | 30        |
| 4q1v        | 46        | 35        | 54        | 39        | 56        | 39        | 4q34        | 42        | 40        | 72        | 52        | 75        | 53        |
| 4q53        | 35        | 38        | 58        | 48        | 42        | 40        | 4q6k        | 32        | 27        | 71        | 48        | 36        | 28        |
| 4q9a        | 90        | 49        | 71        | 51        | 61        | 44        | 4qjr        | 32        | 28        | 37        | 31        | 36        | 31        |
| 4qni        | 45        | 35        | 75        | 51        | 69        | 48        | 4r0k        | 28        | 25        | 28        | 25        | 47        | 37        |
| 4rvo        | 89        | 46        | 81        | 52        | 71        | 48        | 4rwv        | 30        | 29        | 37        | 32        | 37        | 33        |
| 4yod        | 63        | 45        | 66        | 46        | 68        | 47        | <b>1s45</b> | <b>65</b> | <b>42</b> | <b>69</b> | <b>49</b> | <b>64</b> | <b>45</b> |
| 1s47        | 65        | 43        | 68        | 51        | 88        | 51        | 2b1d        | 79        | 46        | 84        | 53        | 87        | 55        |
| 2htt        | 41        | 29        | ---       | ---       | 44        | 34        | 3ce5        | 47        | 39        | 50        | 40        | 63        | 46        |
| 3eil        | 41        | 31        | 65        | 56        | 84        | 55        | 3gom        | 40        | 31        | 59        | 47        | 86        | 55        |
| 3goo        | 35        | 28        | 44        | 38        | 37        | 31        | 3n4o        | 27        | 22        | 27        | 23        | 30        | 25        |
| 3tok        | 46        | 35        | 53        | 40        | 51        | 39        | 4gsg        | 49        | 34        | ---       | ---       | 57        | 36        |
| 4l24        | 38        | 21        | 50        | 43        | 37        | 24        | 4ltl        | 57        | 44        | 57        | 48        | 62        | 48        |
| 4ms5        | 69        | 49        | 87        | 57        | 86        | 55        | 4wo3        | 66        | 41        | 70        | 47        | 86        | 48        |
| 4xqz        | 44        | 32        | 46        | 33        | 88        | 45        | 4zym        | 88        | 51        | 74        | 54        | 87        | 56        |
| 5cv2        | 90        | 50        | 62        | 53        | 89        | 54        | 5i4s        | 34        | 25        | ---       | ---       | 55        | 35        |
| 5ihd        | 40        | 34        | 45        | 36        | 88        | 52        | 5j0e        | 49        | 35        | 76        | 53        | 75        | 50        |
| 5ju4        | 25        | 27        | 28        | 28        | 89        | 57        | 5lj4        | 28        | 26        | ---       | ---       | 46        | 34        |
| 5mvt        | 28        | 29        | 46        | 38        | 55        | 41        | 5nt5        | 21        | 26        | 25        | 29        | 21        | 28        |
| 5t4w        | 21        | 25        | 49        | 42        | 46        | 36        | 5tgp        | 22        | 27        | 57        | 46        | 89        | 53        |
| 5ua3        | 60        | 43        | 80        | 50        | 86        | 53        | 6f3c        | 51        | 42        | 51        | 46        | 70        | 52        |
| 6h5r        | 55        | 40        | 67        | 50        | 79        | 53        | 6tzq        | 38        | 36        | 34        | 37        | 40        | 38        |
| <b>1iha</b> | <b>40</b> | <b>34</b> | <b>41</b> | <b>35</b> | <b>87</b> | <b>51</b> | 1lc4        | 29        | 24        | 43        | 39        | 35        | 28        |
| 1mwl        | 29        | 25        | 46        | 41        | 35        | 29        | 1q96        | 89        | 52        | 89        | 57        | 89        | 55        |
| 1z7f        | 32        | 32        | 34        | 33        | 38        | 34        | 2a0p        | 28        | 27        | 30        | 28        | 30        | 29        |
| 2fd0        | 33        | 32        | 36        | 33        | 55        | 39        | 2pn4        | 35        | 33        | 61        | 51        | 45        | 40        |
| 3d2v        | 31        | 27        | 65        | 49        | 57        | 41        | 3fs0        | 30        | 23        | ---       | ---       | 55        | 37        |
| 3owi        | 31        | 28        | 50        | 45        | 39        | 35        | 3oxm        | 21        | 22        | 22        | 30        | 20        | 23        |
| 3s49        | 28        | 31        | 90        | 57        | 89        | 53        | 3td1        | 37        | 32        | 66        | 51        | 80        | 52        |
| 4enc        | 28        | 25        | 30        | 31        | 30        | 26        | 4jab        | 40        | 27        | 50        | 37        | 44        | 33        |
| 5fj0        | 90        | 51        | 72        | 56        | 80        | 57        | 5kvj        | 52        | 30        | 72        | 49        | 55        | 28        |
| 5l4o        | 41        | 32        | 48        | 40        | 64        | 46        | 5nz6        | 27        | 23        | 40        | 37        | 28        | 27        |
| 5ux3        | 90        | 51        | 89        | 58        | 89        | 58        | 5uz6        | 33        | 34        | 77        | 51        | 89        | 52        |
| 5zeg        | 74        | 48        | 88        | 56        | 89        | 55        | 6az4        | 42        | 36        | 59        | 49        | 44        | 38        |
| 6cab        | 59        | 45        | 58        | 50        | 61        | 50        |             |           |           |           |           |           |           |

---

**Table S3.** The MA values obtained by the pipelines REMO22+SYNERGY+CAB (MA<sub>RSC</sub>), PHASER+SYNERGY+CAB (MA<sub>PSC</sub>) and MOLREP + SYNERGY + CAB (MA<sub>MSC</sub>), for each test structure. Data for the first structure of each subset (PH, PD, PG, DNA, RNA in the order) are in bold. Dashes indicate cases where PHASER stops prematurely while trying to estimate the number of chains in the target asymmetric unit.

| PDB         | MA <sub>RSC</sub> | MA <sub>PSC</sub> | MA <sub>MSC</sub> | PDB         | MA <sub>RSC</sub> | MA <sub>PSC</sub> | MA <sub>MSC</sub> | PDB         | MA <sub>RSC</sub> | MA <sub>PSC</sub> | MA <sub>MSC</sub> |
|-------------|-------------------|-------------------|-------------------|-------------|-------------------|-------------------|-------------------|-------------|-------------------|-------------------|-------------------|
| <b>1a6m</b> | <b>84</b>         | <b>84</b>         | <b>84</b>         | 1aki        | 92                | 93                | 93                | 1bxo        | 91                | 90                | 91                |
| 1dy5        | 85                | 85                | 4                 | 1kf4        | 86                | 87                | 86                | 1kqw        | 91                | 94                | 94                |
| 1lat        | 23                | 7                 | 25                | 1lys        | 87                | 85                | 83                | 1na7        | 80                | 81                | 83                |
| 1s31        | 77                | 79                | 78                | 1tgx        | 87                | 6                 | 84                | 1tp3        | 91                | 89                | 87                |
| 1xyg        | 89                | 90                | 89                | 1ycn        | 82                | 30                | 81                | 1yxa        | 91                | 7                 | 89                |
| 1zs0        | 89                | 87                | 88                | 2a03        | 94                | 94                | 92                | 2a46        | 92                | 92                | 92                |
| 2a4k        | 88                | 81                | 88                | 2ah8        | 93                | 92                | 94                | 2ayv        | 90                | 89                | 89                |
| 2b5o        | 75                | 33                | 77                | 2f53        | 87                | 87                | 86                | 2f84        | 87                | 89                | 85                |
| 2fc3        | 92                | 92                | 91                | 2gq3        | 87                | 85                | 88                | 2h8q        | 86                | 84                | 87                |
| 2hyw        | 1                 | 91                | 90                | 2i3p        | 63                | 64                | 62                | 2iff        | 3                 | 4                 | 4                 |
| 2o3k        | 92                | 91                | 91                | 2oka        | 83                | 81                | 84                | 2omt        | 90                | 89                | 89                |
| 2otb        | 94                | 93                | 93                | 2p0g        | 86                | 3                 | 87                | 2pby        | 91                | 6                 | 89                |
| 2qu5        | 80                | 79                | 79                | 2sar        | 91                | 39                | 92                | 6ebx        | 88                | 14                | 87                |
| 6rhn        | 91                | 91                | 90                | <b>3nng</b> | <b>24</b>         | <b>17</b>         | <b>1</b>          | 3npg        | 7                 | 3                 | 2                 |
| 3nr6        | 2                 | 3                 | 4                 | 3o8s        | 84                | 2                 | 1                 | 3on5        | 71                | 67                | 68                |
| 3q6o        | 88                | 40                | 20                | 3tx8        | 15                | 9                 | 4                 | 3zyt        | 81                | 2                 | 2                 |
| 4e2t        | 86                | 82                | 86                | 4fqd        | 77                | 9                 | 7                 | 1cgn        | 86                | 88                | 90                |
| 1cgo        | 90                | 90                | 89                | 1e8a        | 87                | 86                | 90                | 2f8m        | 92                | 90                | 93                |
| 5ww0        | 90                | 86                | 87                | <b>1vkf</b> | <b>2</b>          | <b>0</b>          | <b>90</b>         | 1vki        | 95                | 90                | 95                |
| 1vl2        | 90                | 89                | 91                | 1vl7        | 90                | 90                | 90                | 1vlc        | 90                | 90                | 86                |
| 2wu6        | 87                | 87                | 87                | 2x7h        | 89                | 89                | 89                | 3e49        | 89                | 6                 | 90                |
| 3gp0        | 90                | 89                | 88                | 3h9e        | 89                | 88                | 90                | 3h9r        | 76                | 79                | 77                |
| 3khu        | 88                | 88                | 88                | 3l23        | 90                | 90                | 89                | 3llx        | 85                | 86                | 85                |
| 3m7a        | 87                | 88                | 87                | 3mbj        | 85                | 88                | 81                | 3mcq        | 82                | 84                | 83                |
| 3mdo        | 91                | 88                | 90                | 3mz2        | 1                 | 2                 | 1                 | 3nyy        | 84                | 73                | 78                |
| 3obi        | 1                 | 2                 | 87                | 3oz2        | 78                | 79                | 78                | 3p94        | 89                | 2                 | 90                |
| 3ufi        | 69                | 45                | 48                | 3us5        | 93                | 94                | 94                | 4e2e        | 87                | 89                | 87                |
| 4ef2        | 88                | 47                | 88                | 4ezg        | 89                | 89                | 89                | 4fvs        | 1                 | 2                 | 1                 |
| 4gbs        | 79                | 31                | 76                | 4gcm        | 88                | 88                | 88                | 4ler        | 93                | 92                | 93                |
| 4mru        | 90                | 88                | 90                | 4ogz        | 85                | 6                 | 88                | 4ouq        | 87                | 86                | 87                |
| 4q1v        | 90                | 90                | 90                | 4q34        | 90                | 91                | 91                | 4q53        | 73                | 73                | 74                |
| 4q6k        | 93                | 9                 | 93                | 4q9a        | 2                 | 4                 | 75                | 4qjr        | 77                | 74                | 75                |
| 4qni        | 74                | 77                | 74                | 4r0k        | 91                | 77                | 91                | 4rvo        | 1                 | 1                 | 24                |
| 4rwv        | 81                | 82                | 85                | 4yod        | 79                | 83                | 83                | <b>1s45</b> | <b>64</b>         | <b>37</b>         | <b>75</b>         |
| 1s47        | 19                | 10                | 3                 | 2b1d        | 10                | 6                 | 5                 | 2htt        | 77                | ---               | 74                |
| 3ce5        | 58                | 56                | 31                | 3eil        | 85                | 46                | 11                | 3gom        | 91                | 84                | 5                 |
| 3goo        | 91                | 94                | 93                | 3n4o        | 61                | 68                | 50                | 3tok        | 45                | 45                | 45                |
| 4gsg        | 41                | ---               | 44                | 4l24        | 70                | 87                | 84                | 4ltl        | 73                | 75                | 77                |
| 4ms5        | 45                | 5                 | 1                 | 4wo3        | 26                | 24                | 3                 | 4xqz        | 92                | 93                | 3                 |
| 4zym        | 1                 | 6                 | 2                 | 5cv2        | 1                 | 23                | 3                 | 5i4s        | 66                | ---               | 52                |
| 5ihd        | 93                | 92                | 3                 | 5j0e        | 81                | 38                | 54                | 5ju4        | 90                | 100               | 2                 |

---

|             |           |           |          |      |    |    |    |      |    |    |    |
|-------------|-----------|-----------|----------|------|----|----|----|------|----|----|----|
| 5lj4        | 84        | ---       | 93       | 5mvt | 98 | 95 | 86 | 5nt5 | 98 | 88 | 71 |
| 5t4w        | 95        | 95        | 96       | 5tgp | 99 | 65 | 1  | 5ua3 | 42 | 26 | 9  |
| 6f3c        | 59        | 70        | 60       | 6h5r | 47 | 45 | 44 | 6tzq | 84 | 84 | 86 |
| <b>1iha</b> | <b>82</b> | <b>81</b> | <b>2</b> | 1lc4 | 86 | 74 | 69 | 1mwl | 81 | 76 | 78 |
| 1q96        | 2         | 1         | 2        | 1z7f | 99 | 96 | 99 | 2a0p | 99 | 99 | 99 |
| 2fd0        | 89        | 84        | 85       | 2pn4 | 77 | 28 | 91 | 3d2v | 88 | 44 | 89 |
| 3fs0        | 92        | ---       | 78       | 3owi | 82 | 73 | 76 | 3oxm | 89 | 76 | 75 |
| 3s49        | 86        | 1         | 1        | 3td1 | 85 | 81 | 81 | 4enc | 90 | 82 | 80 |
| 4jab        | 92        | 81        | 85       | 5fj0 | 1  | 9  | 11 | 5kvj | 66 | 27 | 57 |
| 5l4o        | 56        | 62        | 61       | 5nz6 | 62 | 59 | 56 | 5ux3 | 1  | 1  | 1  |
| 5uz6        | 92        | 19        | 3        | 5zeg | 19 | 1  | 3  | 6az4 | 78 | 74 | 77 |
| 6cab        | 36        | 39        | 45       |      |    |    |    |      |    |    |    |

---

*SIR22 directives for refining PHASER or MOLREP data using SYNERGY+CAB segments*

If the users prefer to use PHASER or MOLREP as an MR program, they will need to provide a few additional directives to process their data through the segments SYNERGY+CAB. As an example, we will use the 1aki structure and MOLREP as the MR program:

```
%cab buccaneer
%structure 1aki
%job ORTHORHOMBIC FORM OF HEN EGG-WHITE LYSOZYME AT 1.5 Å RESOLUTION
%data
mtz 1aki.mtz
label H K L F SIGF
sequence 1aki.seq
%refine
model 1aki_MolRep.pdb
mtz 1aki_MolRep.mtz
label H K L F SIGF PHIC_ALL FOM
%end
```
